# Supplementary material for: Enhanced portable detection for Sars-CoV-2 utilizing DNA tetrahedron-tethered aptamers and a pressure meter
Source: Royal Society of Chemistry journal article supplement (doi:10.1039/d3ay02100a), 2023-12-21
Supplement: d3ay02100a1.pdf [file d3ay02100a1.pdf]

<sup>1</sup>Supplementary Material (ESI) for  
This journal is (c) The Royal Society of Chemistry 202X

## Enhanced portable detection for SARS-CoV-2 utilizing DNA tetrahedron-tethered aptamers and a pressure meter

Xingbo Yu,<sup>a</sup> Ying Wang,<sup>a</sup> Kun Wang,<sup>a</sup> Ziyuan Zhu,<sup>b</sup> Lu Xiao,<sup>a</sup> Yishun Huang,<sup>\*b</sup> Yanling Song,<sup>c</sup> and  
Dan Liu<sup>\*a</sup>

- a. Engineering Research Centre of Molecular Medicine of Ministry of Education, Key Laboratory of Fujian Molecular Medicine, Key Laboratory of Precision Medicine and Molecular Diagnosis of Fujian Universities, School of Medicine, Huaqiao University, Xiamen, China. E-mail: [liudan@hqu.edu.cn](mailto:liudan@hqu.edu.cn)
- b. Institute of Analytical Technology and Smart Instruments, Xiamen Key Laboratory of Food and Drug Safety, College of Environment and Public Health, Xiamen Huaxia University, Xiamen, China. E-mail: [huangys@hxxy.edu.cn](mailto:huangys@hxxy.edu.cn)
- c. Department of Chemical Biology, College of Chemistry and Chemical Engineering, Xiamen University, Xiamen, China

\* Corresponding authors.

**Table S1 Sequences of the DNA strands**

| Name   | Sequence                                                                                                                                        |
|--------|-------------------------------------------------------------------------------------------------------------------------------------------------|
| Apt1-A | 5'-CGCAGCACCCAAGAACAAGGACTGCTTAGGATTGCGATAGGTTTCGGTTTTTTACATTCC<br>TAAGTCTGAAACATTACA GCTTGCTACACGAGAAGAGCCGCATAGTA -3'                         |
| Apt2-A | 5'-ATCCAGAGTGACGCAGCATTTTCATCGGGTCCAAAAGGGGCTGCTCGGGATTGCGGATA<br>TGGACACGTTTTTTTACATTCTAAGTCTGAAACATTACAGCTTGCTACACGAGAAGAGCC<br>GCCATAGTA -3' |
| Apt3-A | 5'-CAGCACCGACCTTGTGCTTTGGGAGTGCTGGTCCAAGGGCGTTAATGGACATTTTTTAC<br>ATTCCTAAGTCTGAAACATTACAGCTTGCTACACGAGAAGAGCCGCATAGTA -3'                      |

**Table S2 Information of detecting oropharyngeal swab samples by pressure meter**

| Sample NO. | Volunteer NO. | PSV (TU ml <sup>-1</sup> ) | Sample NO. | Volunteer NO. | PSV (TU ml <sup>-1</sup> ) |
|------------|---------------|----------------------------|------------|---------------|----------------------------|
| Positive   |               |                            | Negative   |               |                            |
| 1          | 1             | 200                        | 1          | 1             | 0                          |
| 2          | 2             | 200                        | 2          | 2             | 0                          |
| 3          | 3             | 200                        | 3          | 3             | 0                          |
| 4          | 4             | 200                        | 4          | 4             | 0                          |
| 5          | 5             | 40                         | 5          | 5             | 0                          |
| 6          | 6             | 40                         | 6          | 6             | 0                          |
| 7          | 7             | 40                         | 7          | 7             | 0                          |
| 8          | 8             | 40                         | 8          | 8             | 0                          |
| 9          | 9             | 4                          | 9          | 9             | 0                          |
| 10         | 10            | 4                          | 10         | 10            | 0                          |
| 11         | 11            | 4                          | 11         | 11            | 0                          |
| 12         | 12            | 2                          | 12         | 12            | 0                          |
| 13         | 13            | 2                          | 13         | 13            | 0                          |
| 14         | 14            | 2                          | 14         | 14            | 0                          |
| 15         | 15            | 2                          | 15         | 15            | 0                          |
